# Supplementary material for: Pseudo-Interface Switching of a Two-Terminal TaOx/HfO2 Synaptic Device for Neuromorphic Applications
Source: MDPI journal article supplement (doi:10.3390/nano10081550), 2020-08-07
Supplement: s1 [file s1]

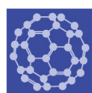

Supplementary Material

# Pseudo-Interface Switching of a Two-Terminal TaO<sub>x</sub>/HfO<sub>2</sub> Synaptic Device for Neuromorphic Applications

Hojeong Ryu and Sungjun Kim \*

Division of Electronics and Electrical Engineering, Dongguk University, Seoul 04620, Korea;  
hojeong.ryu@dongguk.edu

\* Correspondence: sungjun@dongguk.edu

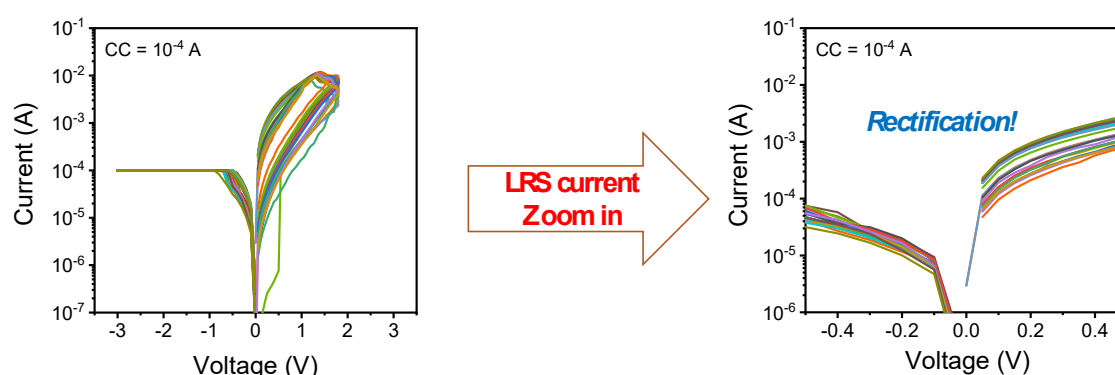

Figure S1. Rectifying I-V characteristics of the TaO<sub>x</sub>/HfO<sub>2</sub> memristor in the LRS at CC of 10<sup>-4</sup> A.

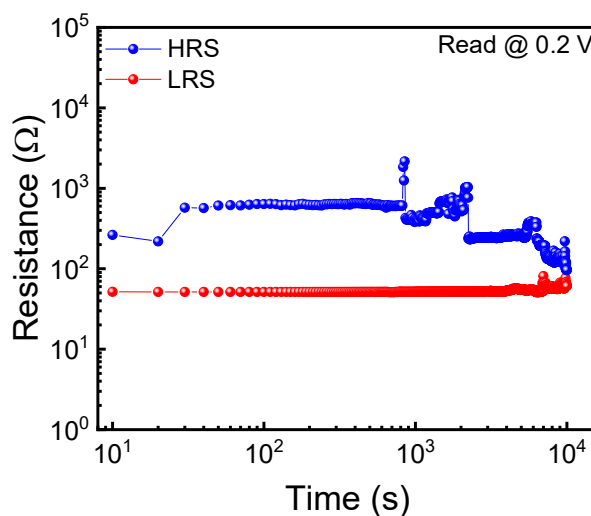

Figure S2. Retention test for interface-type switching of the TaO<sub>x</sub>/HfO<sub>2</sub> memristor.

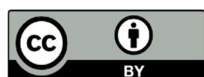

© 2020 by the authors. Licensee MDPI, Basel, Switzerland. This article is an open access article distributed under the terms and conditions of the Creative Commons Attribution (CC BY) license (<http://creativecommons.org/licenses/by/4.0/>).
